# Supplementary material for: Separation and isolation of CD9-positive extracellular vesicles from plasma using flow cytometry
Source: Royal Society of Chemistry journal article supplement (doi:10.1039/d3na00081h), 2023-01-01
Supplement: d3na00081h1.pdf [file d3na00081h1.pdf]

## SUPPLEMENTAL FIGURES

Separation and Isolation of CD9-Positive Extracellular Vesicles from Plasma Using Flow Cytometry

*Karan Khanna,<sup>1</sup> Nikki Salmond,<sup>1</sup> Sina Halvaei,<sup>1</sup> Andrew Johnson,<sup>2</sup> and Karla C. Williams<sup>1,4</sup>*

<sup>1</sup>Faculty of Pharmaceutical Sciences, The University of British Columbia, Vancouver, V6T 1Z3, Canada

<sup>2</sup>Faculty of Medicine, UBC Flow Facility, The University of British Columbia, Vancouver, V6T 1Z3, Canada

<sup>4</sup>Correspondence to: [karla.williams@ubc.ca](mailto:karla.williams@ubc.ca)

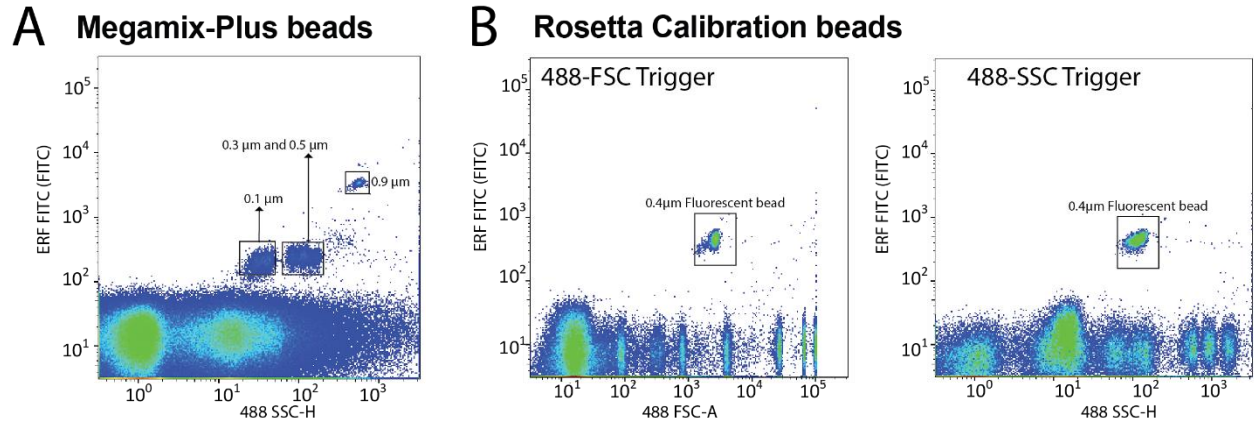

**Figure S1:** (A) Megamix-Plus polystyrene beads triggered using 488 SSC-H analyzed on the FITC channel. (B) Rosetta calibration beads analysed on the Astrios EQ using different triggering strategies. Left plot, resolution of beads when triggered using 488-FSC. Right plot, resolution of beads when triggered using 488-SSC.

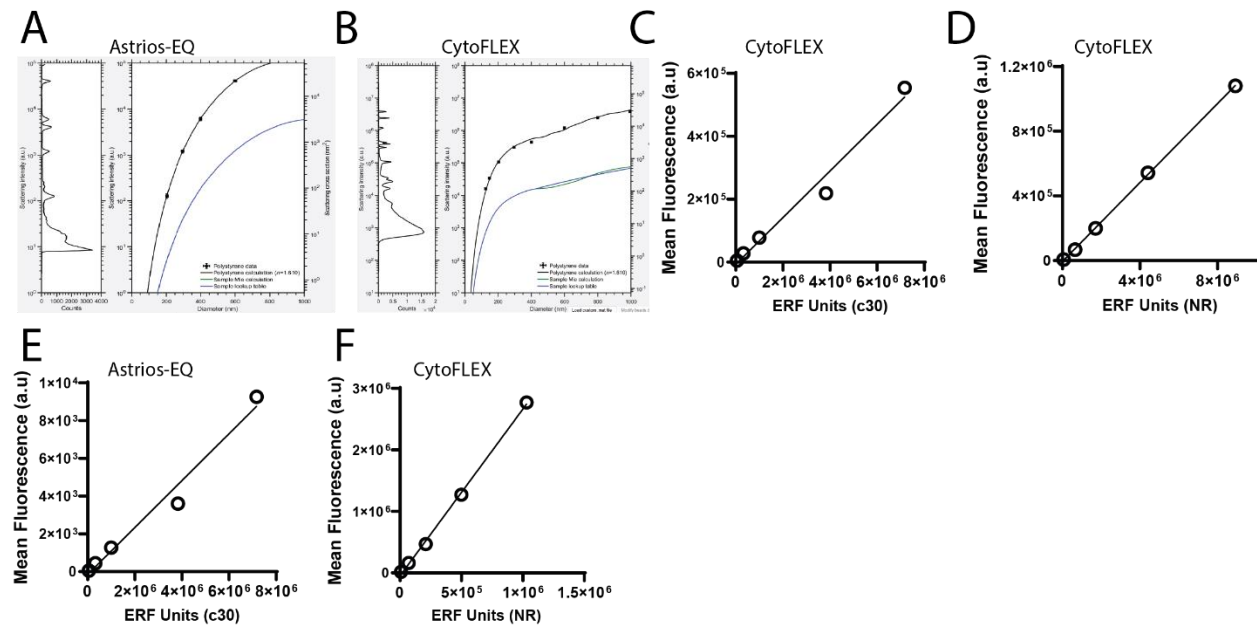

**Figure S2:** Calibration plots for the Astrios-EQ (A) and CytoFLEX (B) using Rosetta beads and calibration software. (C-F) Calibration plot using SPHERO™ Rainbow Calibration Particles with known Equivalent Number of Reference Fluorophores (ERF) value for each bead plotted against their fluorescence intensity (arbitrary units).

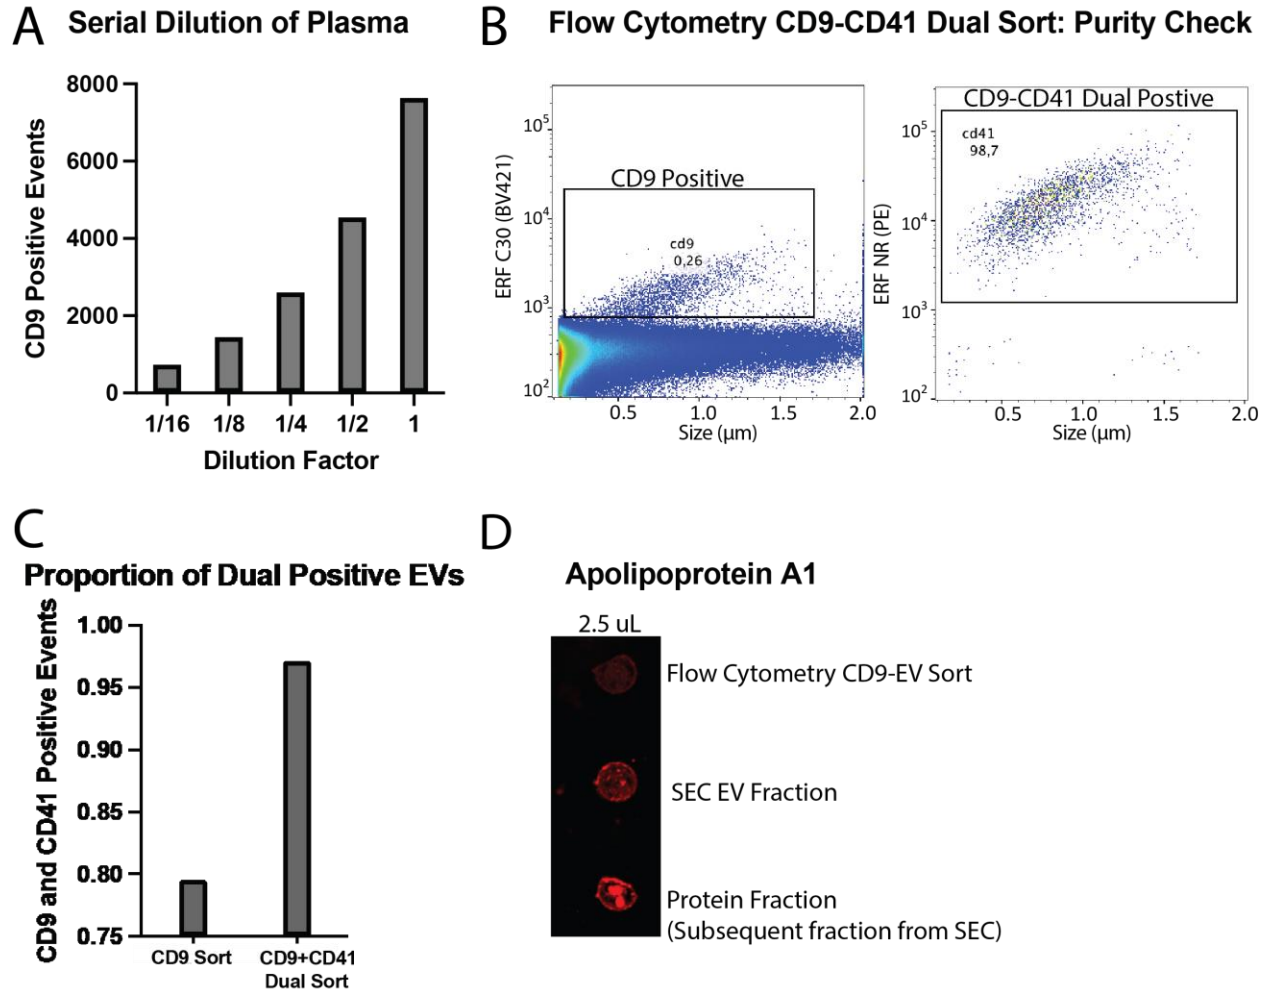

**Figure S3:** CD9 extracellular vesicles sorting by flow cytometry. **(A)** The presence of swarming as assessed by plasma serial dilution and quantification of events by flow cytometry. **(B)** Flow cytometry CD9-CD41 dual positive EVs run on a flow cytometry analyzer. Left plot shows CD9-positive events and right plot shows the number of those events that are dual positive by CD41 immunostaining. **(C)** The proportion of dual positive CD9-CD41 EVs from a CD9-positive sort and a CD9-CD41 dual positive sort (n=2). **(D)** The presence of a common protein contaminant, Apolipoprotein A1, probed on a dot blot (n=2) using CD9-positive flow cytometry isolated EVs (top row), SEC isolated EVs (middle row), and the SEC proteinaceous fraction, collected after the EV fraction, (bottom).
